# Supplementary material for: Greener and whiter analytical method development and validation for determining the presence of zolpidem tartrate infused in apple juice using RP-HPLC via magnetic solid-phase extraction followed by LC-MS confirmatory analysis
Source: Royal Society of Chemistry journal article supplement (doi:10.1039/d4ra04303k), 2024-01-01
Supplement: d4ra04303k1.pdf [file d4ra04303k1.pdf]

## Greener and Whiter Analytical Method Development and Validation of Zolpidem Tartrate Infused in Apple Juice using RP-HPLC via Magnetic Solid Phase Extraction followed by LC-MS confirmatory analysis

Revathy Sundara Moorthy<sup>a</sup>, G. Swetha<sup>a</sup>, Rohini Rondla<sup>b</sup>, Anren Hu<sup>\*c</sup>, Narmada Vallakeerthi<sup>d</sup> and P. Muralidhar Reddy<sup>\*a</sup>

### Supplementary data

#### Preparation of 0.25 mg/ml ZT stock solution

It was prepared by weighing 6.25 mg Active Pharmaceutical Ingredients (API) of ZT and transferred into 25ml standard solution. The drug was filled to the mark of standard flask using distilled water

#### Preparation of 100µg/ml standard solution.

100µg/ml standard solution was prepared by weighing 10mg of ZT API and transferring into 100ml standard flask. The flask was made to the mark using methanol.

#### Optimization of different parameters

Figure S1: Zolpidem API standard chromatogram

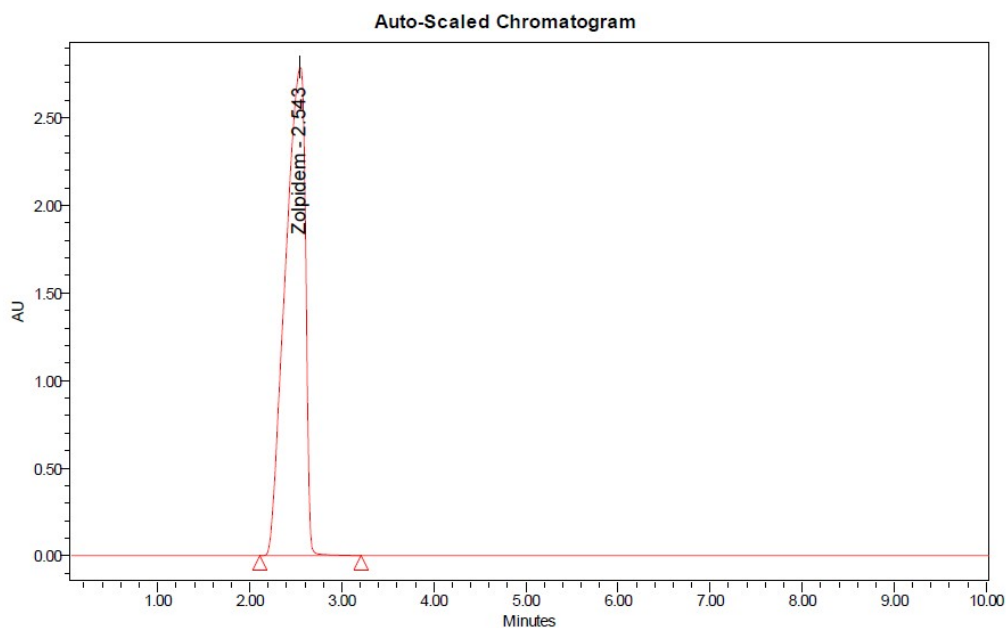

#### Characterization

Table S2: FTIR characterization of Fe<sub>3</sub>O<sub>4</sub>, SiO<sub>2</sub>@Fe<sub>3</sub>O<sub>4</sub>, APTES@Fe<sub>3</sub>O<sub>4</sub>, PEI@SiO<sub>2</sub>@Fe<sub>3</sub>O<sub>4</sub> NPs

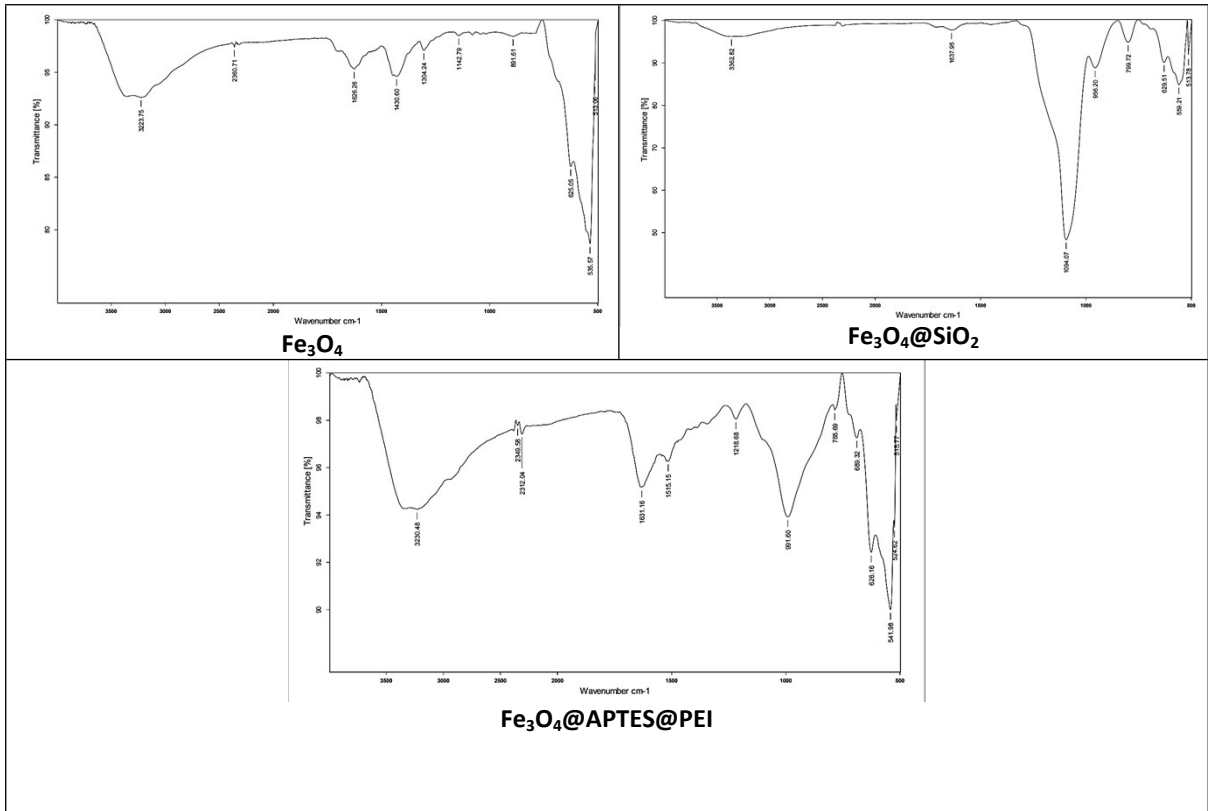

Table S3: SEM-EDX of  $\text{Fe}_3\text{O}_4$ ,  $\text{SiO}_2@\text{Fe}_3\text{O}_4$ ,  $\text{APTES}@Fe_3O_4$ ,  $\text{PEI}@SiO_2@Fe_3O_4$  NPs

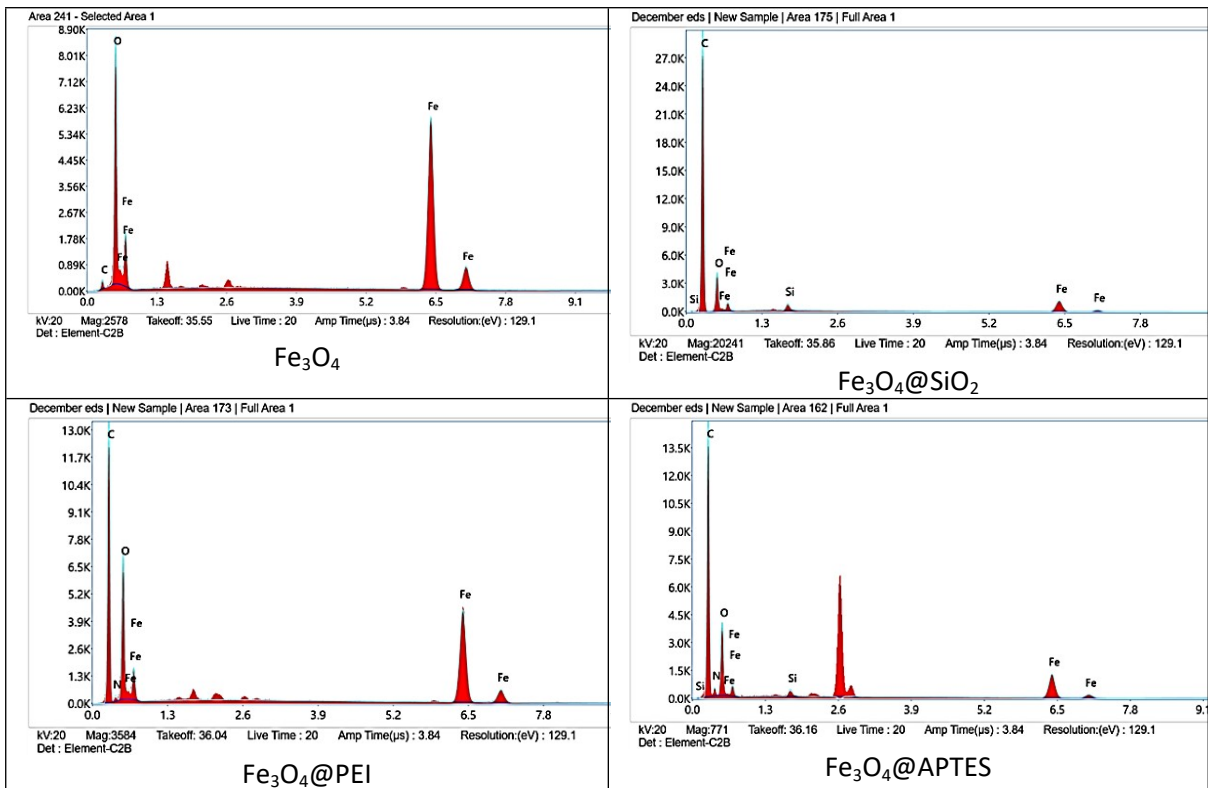

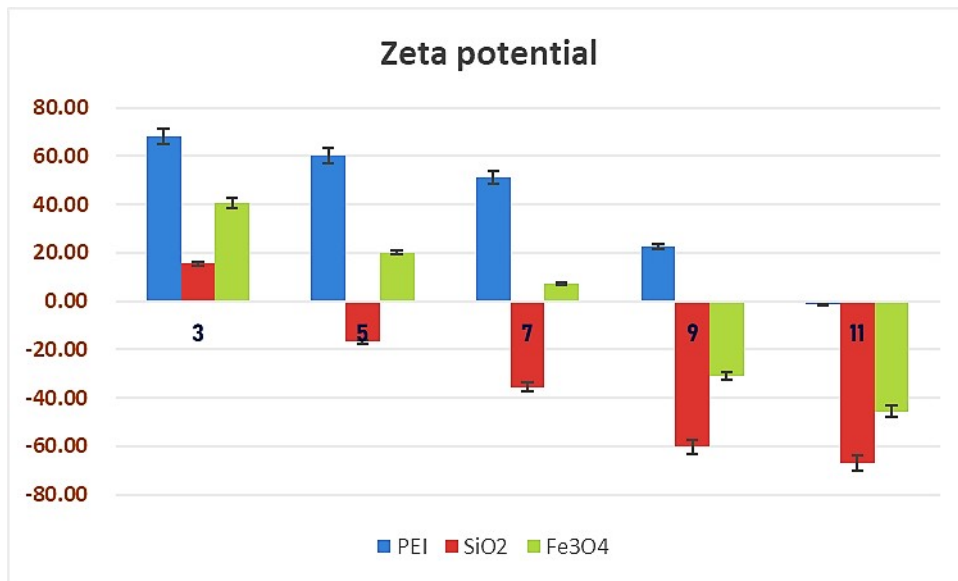

Figure S1: Zeta potential of Fe<sub>3</sub>O<sub>4</sub>, SiO<sub>2</sub>@Fe<sub>3</sub>O<sub>4</sub>, APTES@Fe<sub>3</sub>O<sub>4</sub>, PEI@SiO<sub>2</sub>@Fe<sub>3</sub>O<sub>4</sub> NPs

Morphological characterization

Table S4. SEM and TEM images of Fe<sub>3</sub>O<sub>4</sub>, Fe<sub>3</sub>O<sub>4</sub>@SiO<sub>2</sub> NPs, Fe<sub>3</sub>O<sub>4</sub>@SiO<sub>2</sub>@PEI NPs

| SEM                                                    | TEM                                                |
|--------------------------------------------------------|----------------------------------------------------|
| <p>Fe<sub>3</sub>O<sub>4</sub> NPs</p>                 | <p>Fe<sub>3</sub>O<sub>4</sub></p>                 |
| <p>Fe<sub>3</sub>O<sub>4</sub>@SiO<sub>2</sub> NPs</p> | <p>Fe<sub>3</sub>O<sub>4</sub>@SiO<sub>2</sub></p> |

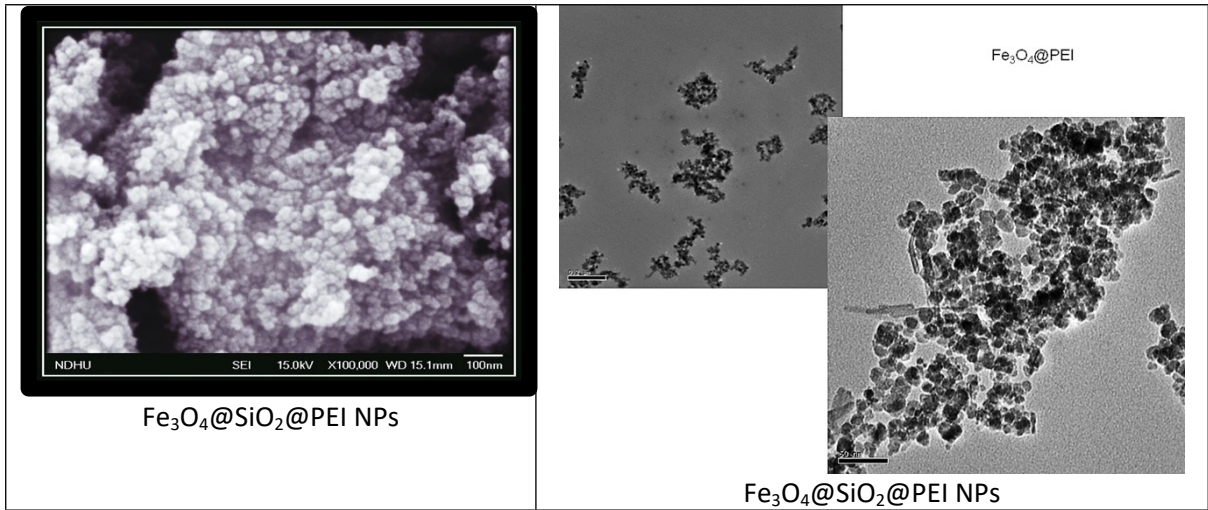

### Method Validation

Table S5: Zolpidem tablet Standard Linearity Chromatograms from 6 to 14 ppm

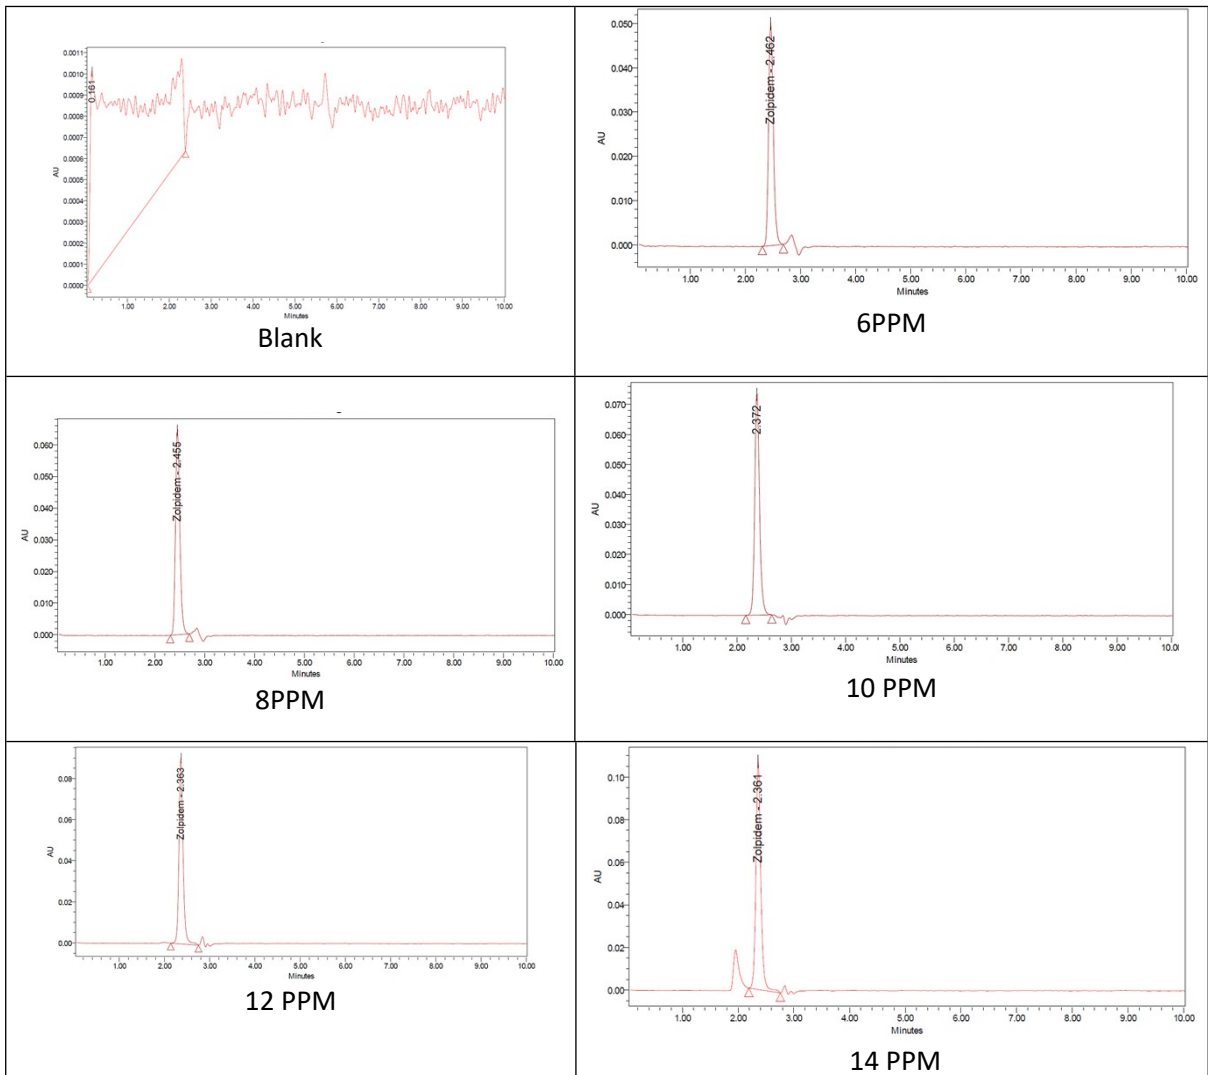

Table S6: Zolpidem extraction linearity Chromatograms from 6 to 14 ppm

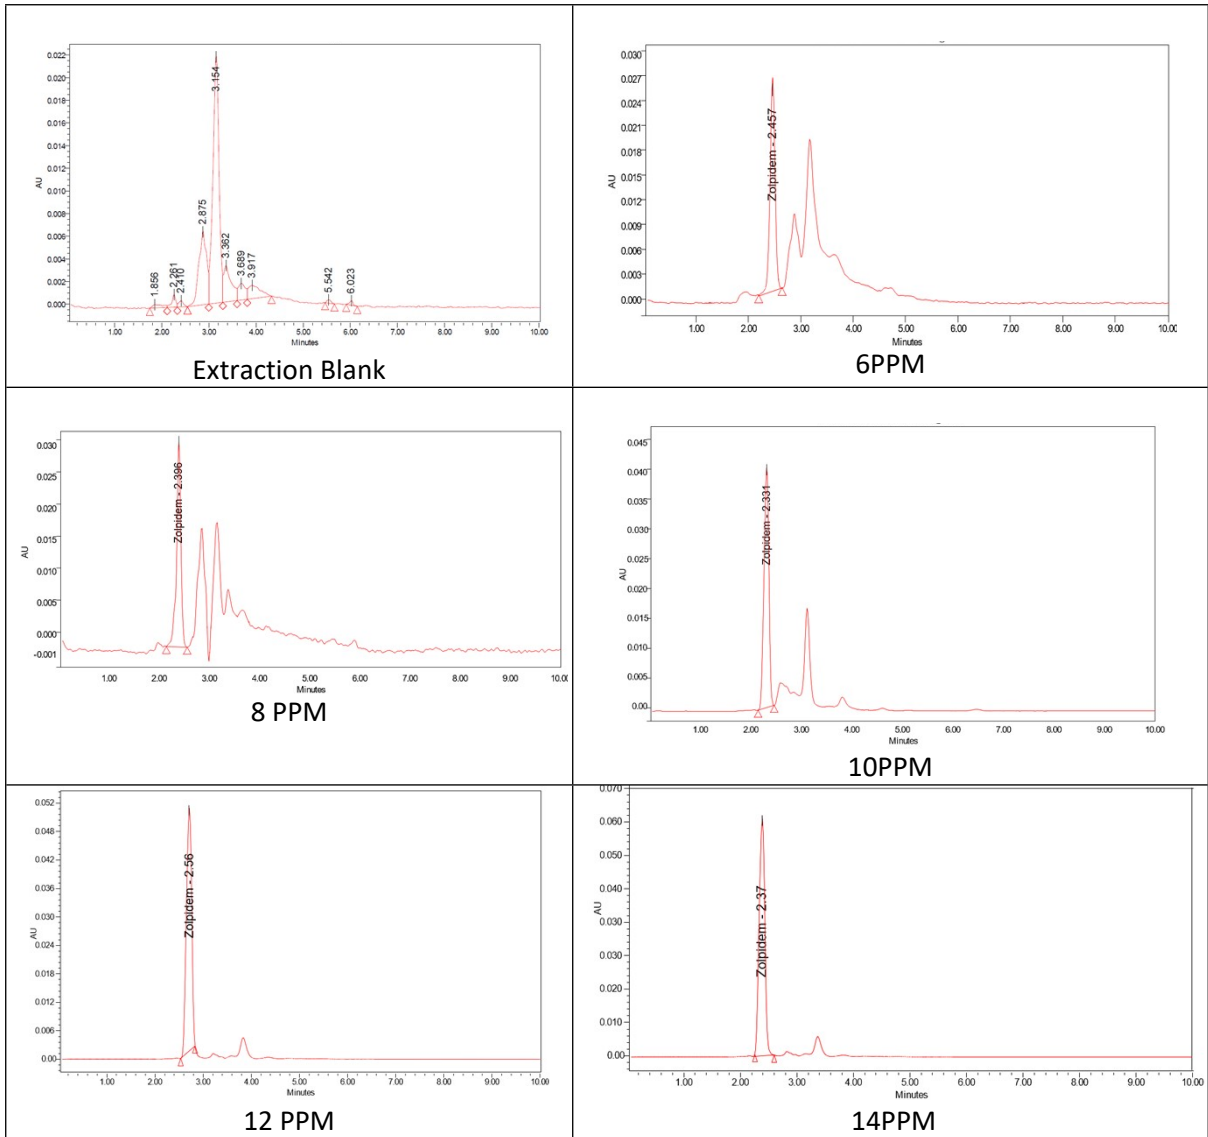

Table S7 Chromatograms of LOD and LOQ

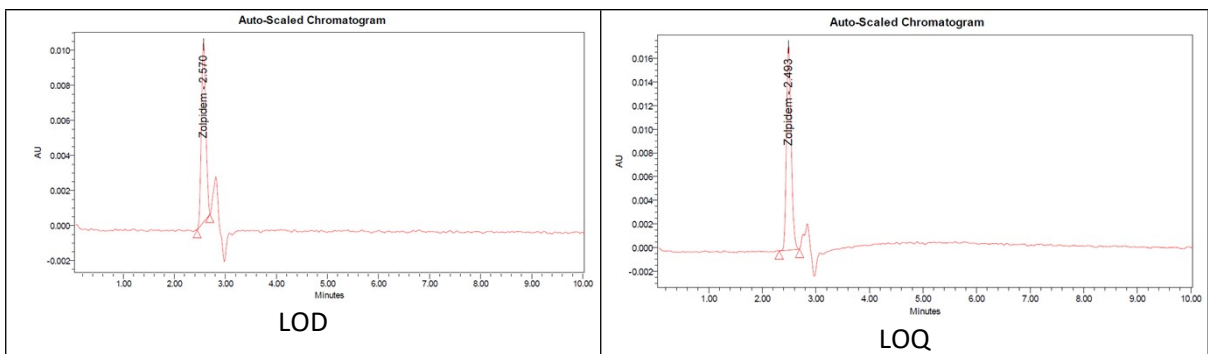

Table S8: Accuracy chromatograms

Accuracy 50%

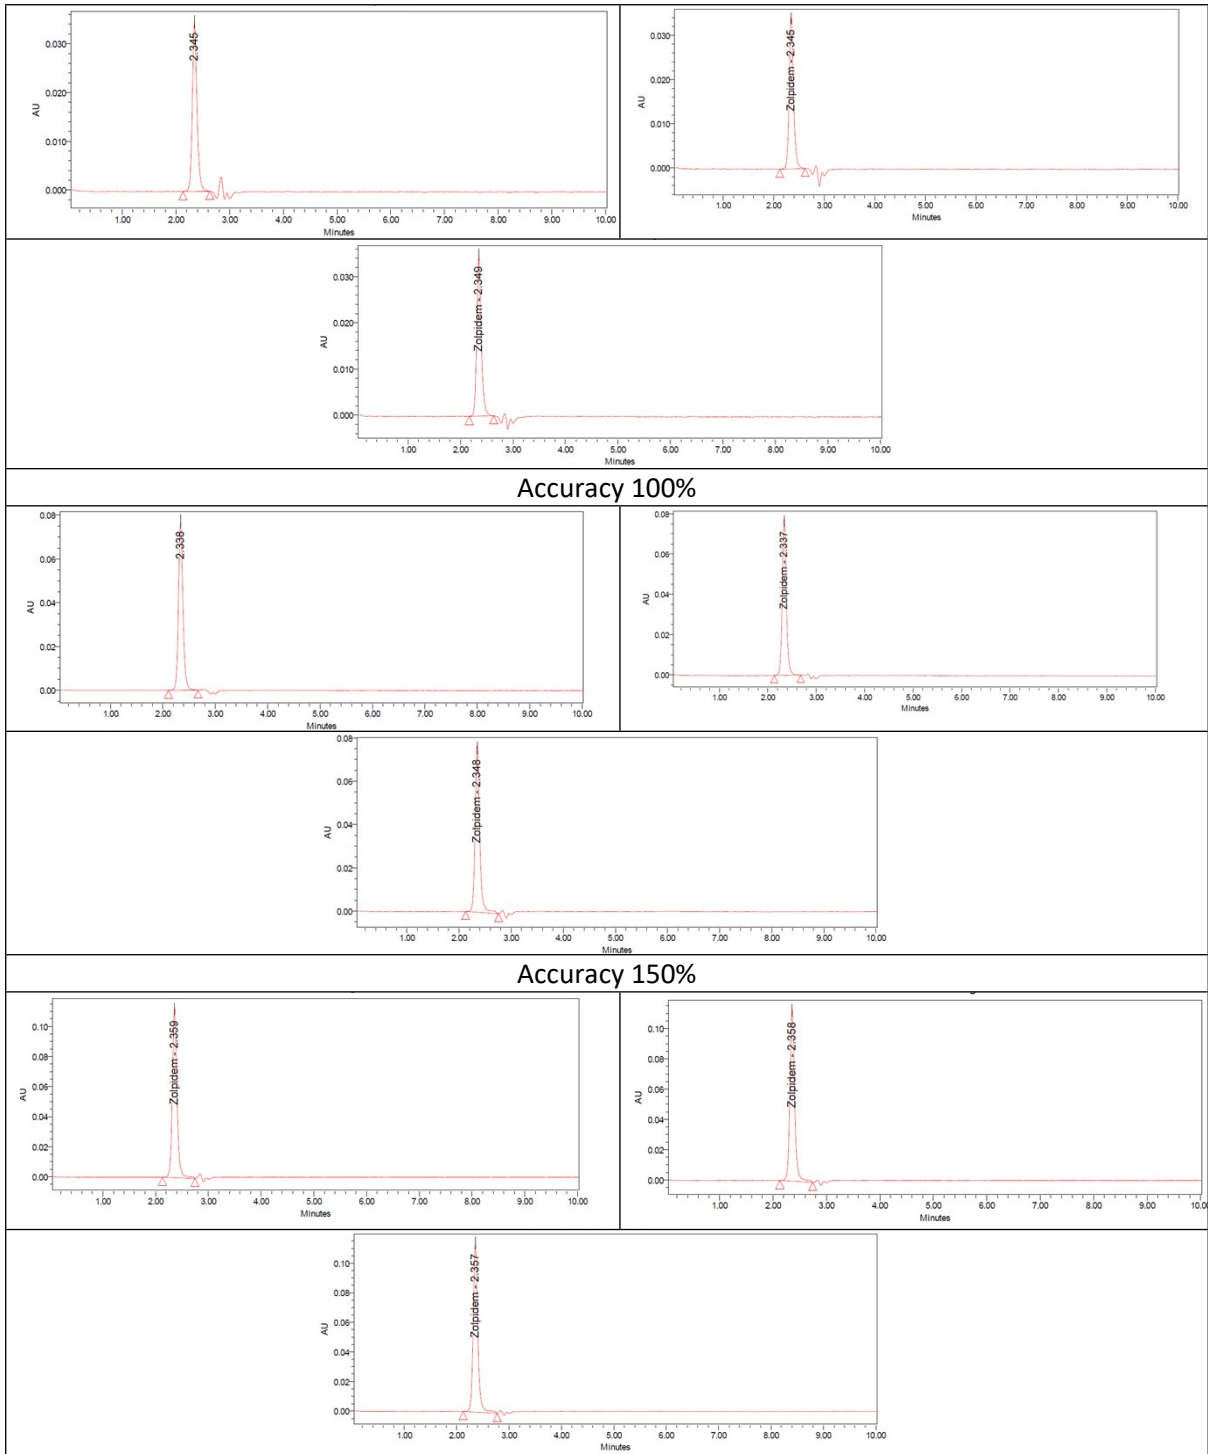

Table S9: Precision for chromatograms

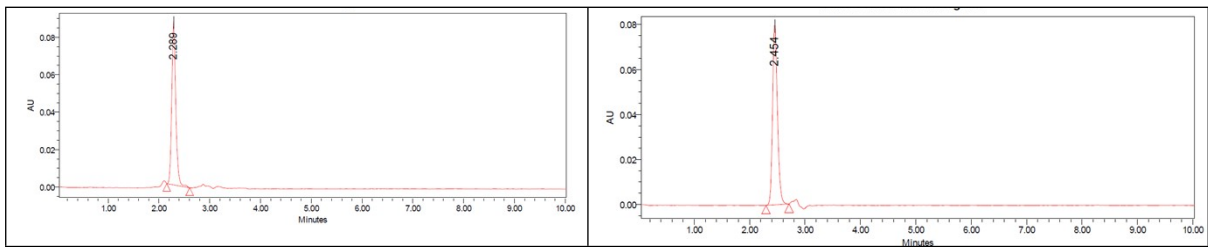

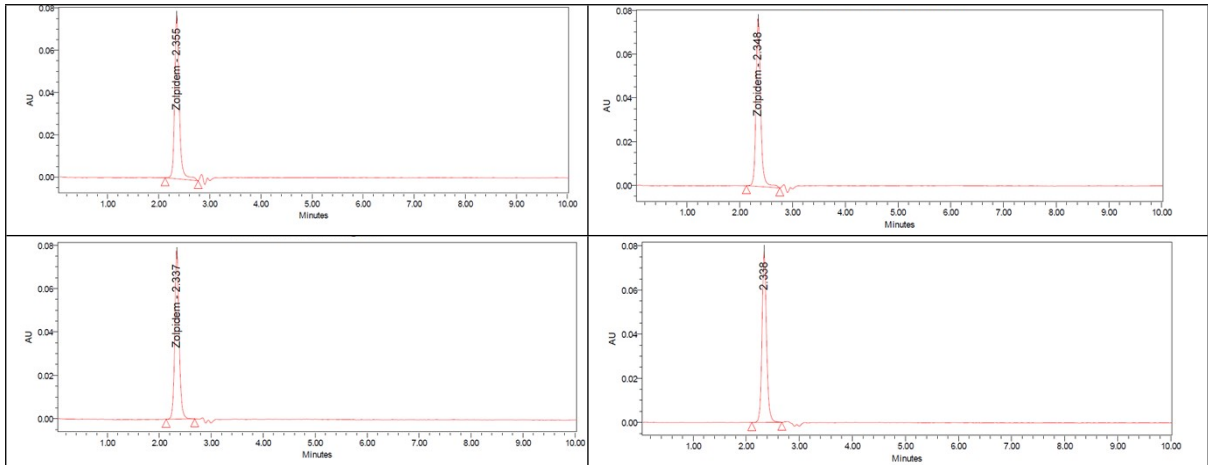

Table S10: Robustness chromatograms

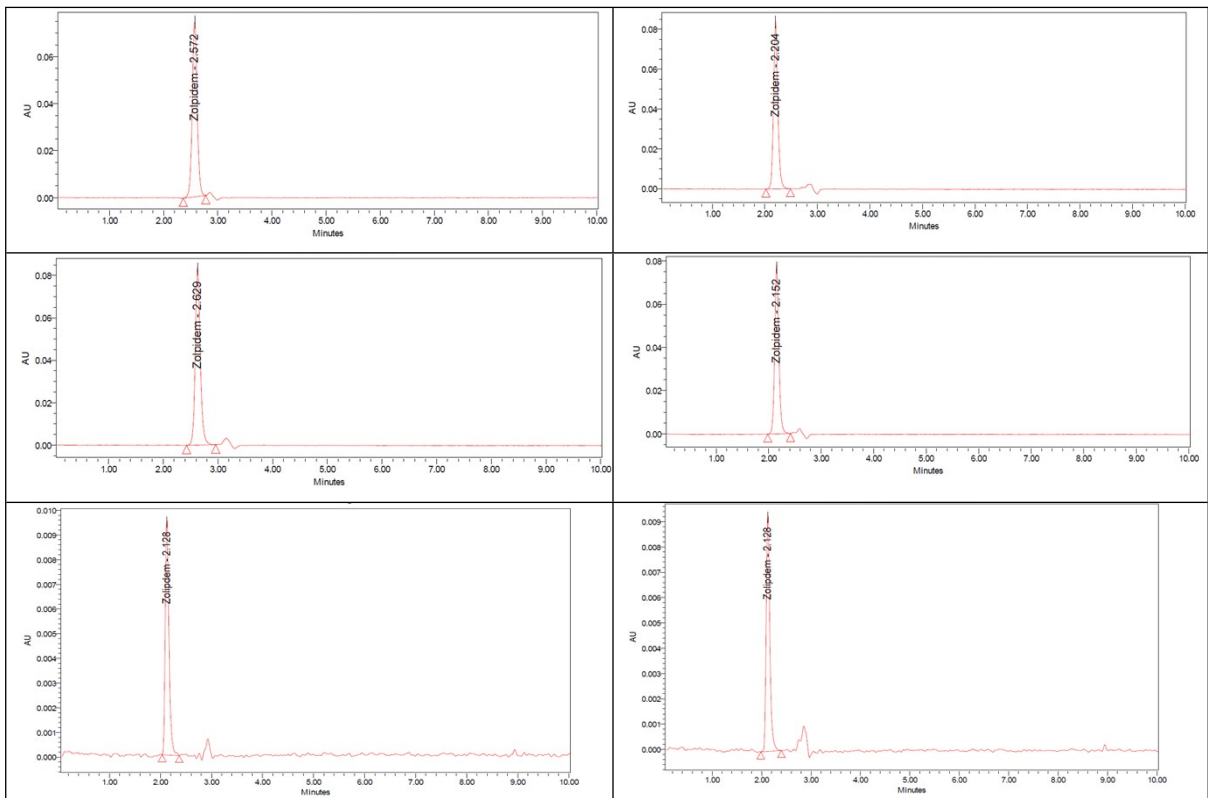

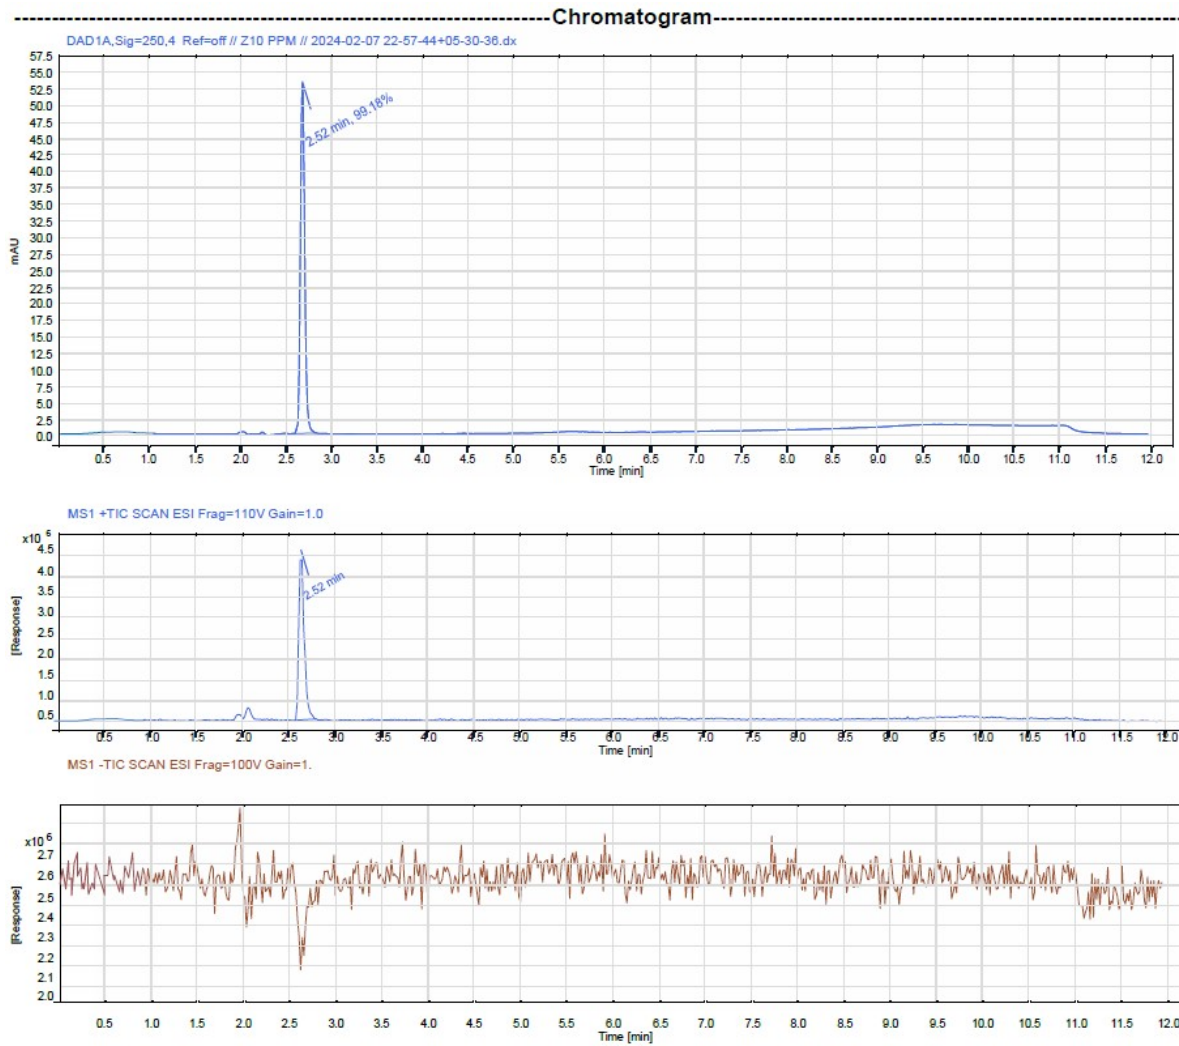

Figure S2: Zolpidem Standard LC-MS chromatogram

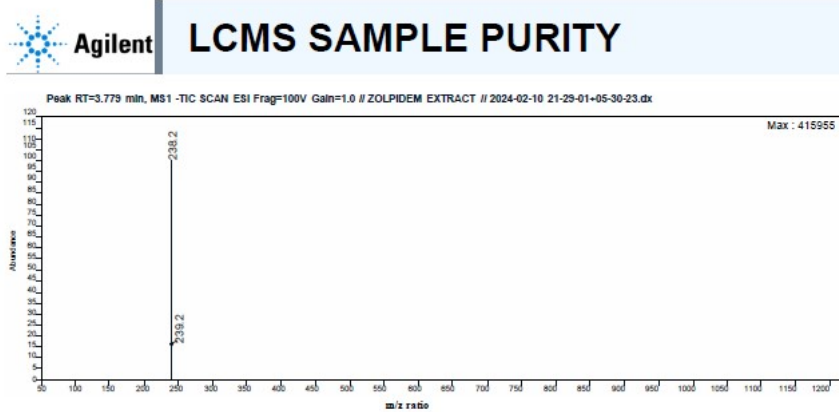

Figure S3: Zolpidem Standard Mass Spectrum



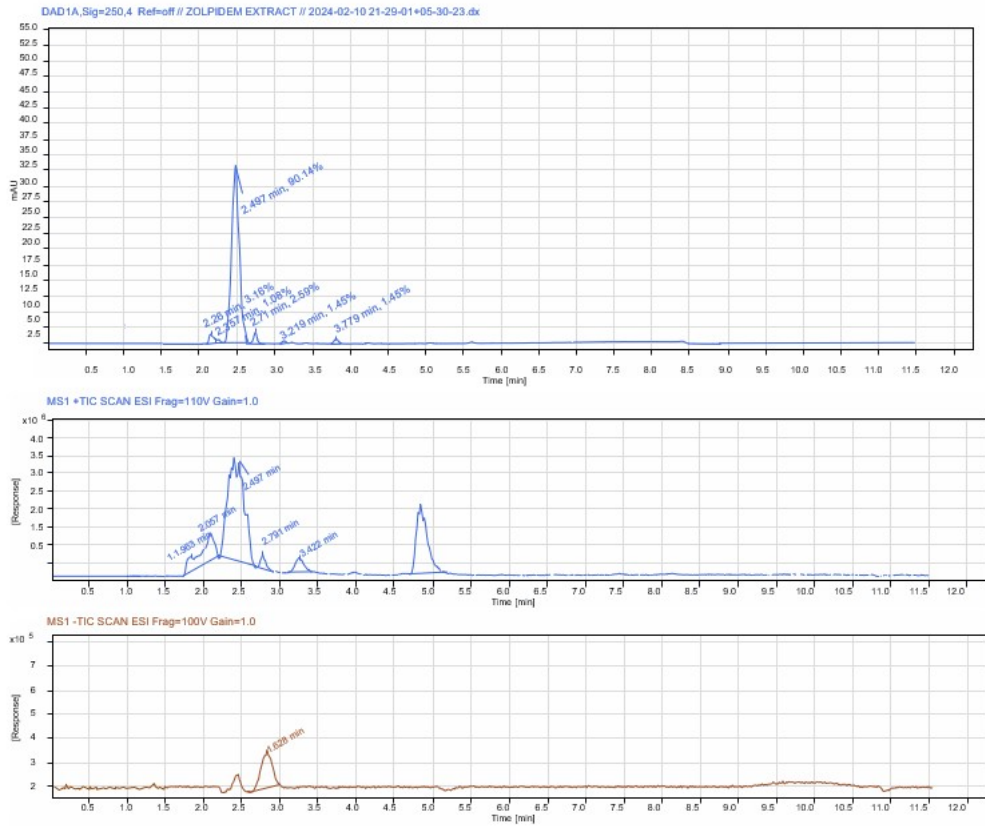

Figure S4: Zolpidem Extract from Apple juice matrix LC-MS chromatogram

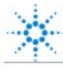

Agilent

# LCMS SAMPLE PURITY

| RT [min] | Area      | Height  | Area%   |
|----------|-----------|---------|---------|
| 2.263    | 74.2797   | 2.7208  | 3.1589  |
| 2.357    | 25.4187   | 1.3207  | 1.0810  |
| 2.497    | 1119.6759 | 32.5346 | 90.1423 |
| 2.719    | 60.8122   | 2.6228  | 2.5861  |
| 3.219    | 15.3548   | 0.8394  | 0.6530  |
| 3.766    | 7.7700    | 1.3217  | 0.3304  |
| 3.072    | 3.5885    | 0.6783  | 0.1526  |
| 3.779    | 34.1311   | 1.9240  | 1.4515  |
| 4.405    | 5.7159    | 0.2578  | 0.2431  |
| 5.745    | 4.7311    | 0.1663  | 0.2012  |

## MS Spectrum

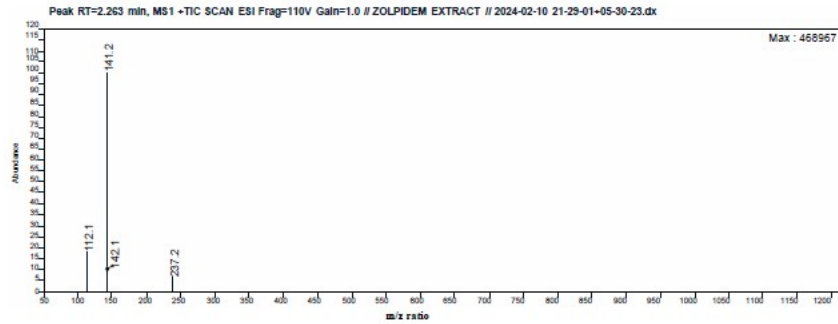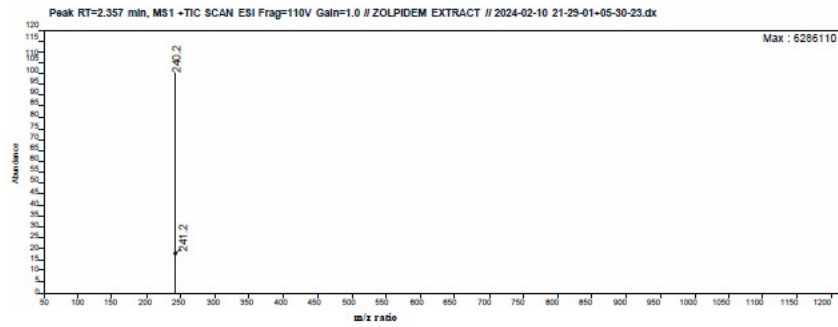

Figure S5: Matrix Mass Spectrum

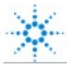

Agilent

# LCMS SAMPLE PURITY

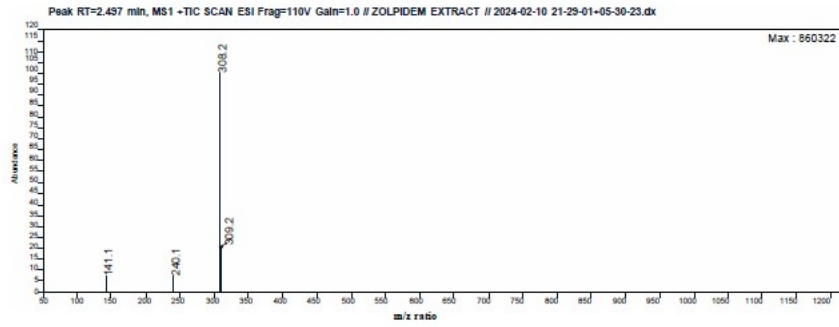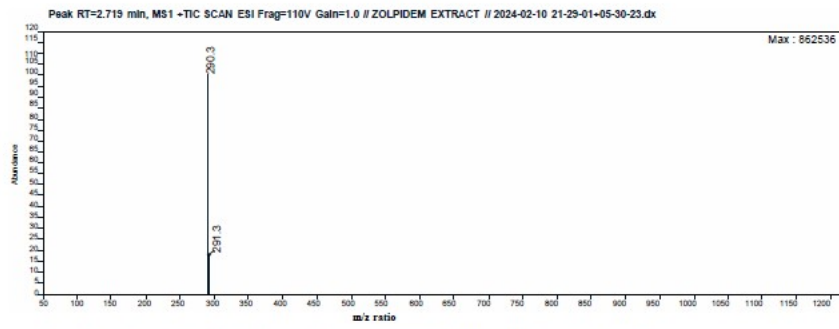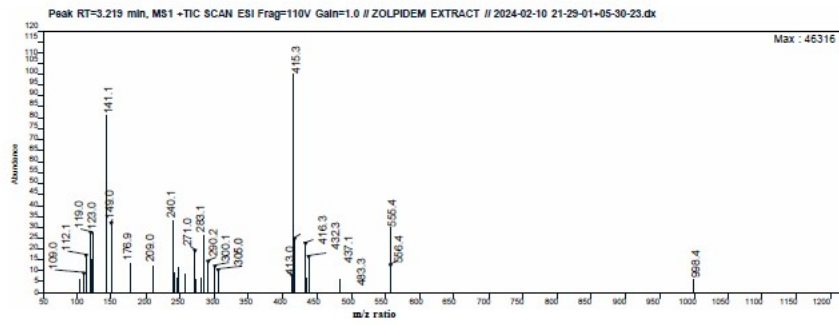

Figure S6: Zolpidem and Matrix Mass Spectrum

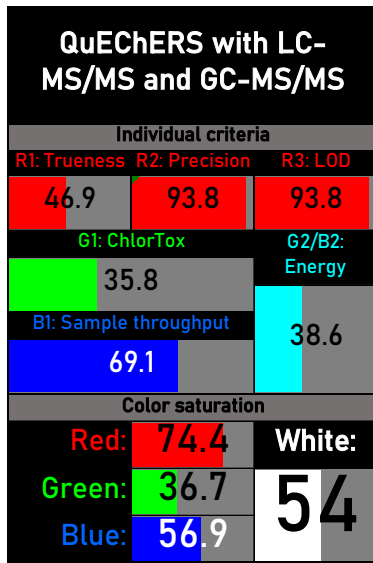

a

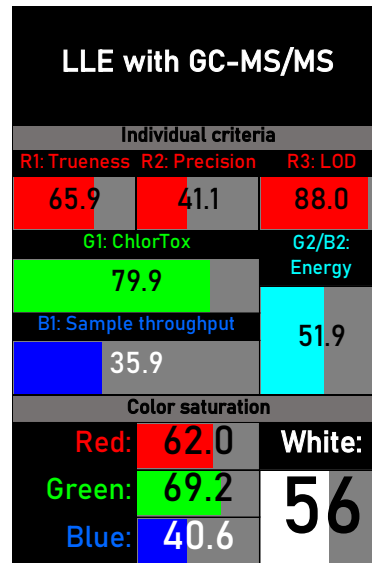

b

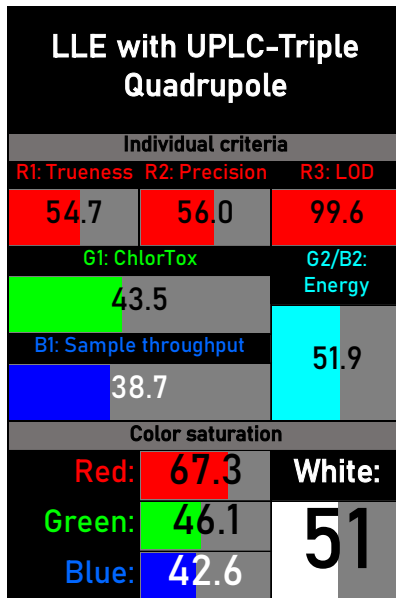

c

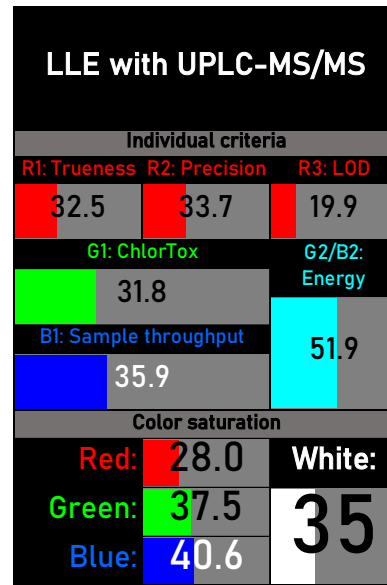

d

| PS-SPE with LC-MS/MS  |               |               |
|-----------------------|---------------|---------------|
| Individual criteria   |               |               |
| R1: Trueness          | R2: Precision | R3: LOD       |
| 41.9                  | 70.6          | 99.8          |
| G1: ChlorTox          |               | G2/B2: Energy |
| 21.2                  | 47.8          |               |
| B1: Sample throughput |               |               |
| 45.7                  |               |               |
| Color saturation      |               |               |
| Red:                  | 66.6          | White:        |
| Green:                | 27.8          | 44            |
| Blue:                 | 46.4          |               |

e

| SPE with LC-MS/MS     |               |               |
|-----------------------|---------------|---------------|
| Individual criteria   |               |               |
| R1: Trueness          | R2: Precision | R3: LOD       |
| 36.8                  | 53.3          | 69.5          |
| G1: ChlorTox          |               | G2/B2: Energy |
| 21.2                  | 50.2          |               |
| B1: Sample throughput |               |               |
| 87.5                  |               |               |
| Color saturation      |               |               |
| Red:                  | 51.4          | White:        |
| Green:                | 28.3          | 47            |
| Blue:                 | 72.7          |               |

f

| Thin Film ME with LC-MS/MS |               |               |
|----------------------------|---------------|---------------|
| Individual criteria        |               |               |
| R1: Trueness               | R2: Precision | R3: LOD       |
| 54.7                       | 30.2          | 100.0         |
| G1: ChlorTox               |               | G2/B2: Energy |
| 26.5                       | 48.6          |               |
| B1: Sample throughput      |               |               |
| 40.9                       |               |               |
| Color saturation           |               |               |
| Red:                       | 54.9          | White:        |
| Green:                     | 32.4          | 43            |
| Blue:                      | 43.3          |               |

g

Figure S7: Comparative study of previous similar methods with detailed RGBfast
